# Supplementary material for: An Ag-grid/graphene hybrid structure for large-scale, transparent, flexible heaters
Source: Royal Society of Chemistry journal article supplement (doi:10.1039/c4nr06984f), 2015-01-01
Supplement: c4nr06984f1.pdf [file c4nr06984f1.pdf]

## Supporting Information

### **Ag-Grid/Graphene Hybrid Structure for Large-Scale, Transparent, Flexible Heaters**

Junmo Kang,<sup>a,b,†</sup> Yonghee Jang,<sup>c,†</sup> Youngsoo Kim,<sup>d</sup> Seung-Hyun Cho,<sup>e</sup> Jonghwan Suhr,<sup>e,f</sup> Byung Hee Hong,<sup>a,g</sup> Jae-Boong Choi,<sup>a,c,\*</sup> and Doyoung Byun<sup>c,\*</sup>

<sup>a</sup> *SKKU Advanced Institute of Nanotechnology (SAINT) and Center for Human Interface Nano Technology (HINT), Sungkyunkwan University, Suwon 440-746, Korea.*

<sup>b</sup> *Departments of Materials Science and Engineering, Northwestern University, Evanston, Illinois 60208, United States.*

<sup>c</sup> *School of Mechanical Engineering, Sungkyunkwan University, Suwon 440-746, Korea.*

<sup>d</sup> *Department of Physics and Astronomy, Seoul National University, Seoul, 151-742, Korea.*

<sup>e</sup> *Department of Polymer Science and Engineering, Sungkyunkwan University, Suwon 440-746, Korea.*

<sup>f</sup> *Department of Engergy Science, Sungkyunkwan University, Suwon 440-746, Korea.*

<sup>g</sup> *Department of Chemistry, Seoul National University, Seoul 143-747, Korea.*

<sup>†</sup>These authors contributed equally to this work.

\* Corresponding Author, e-mail: [boong33@skku.edu](mailto:boong33@skku.edu) and [dybyun@skku.edu](mailto:dybyun@skku.edu)

<sup>†</sup> J. Kang and Y. Jang contributed equally to this work.

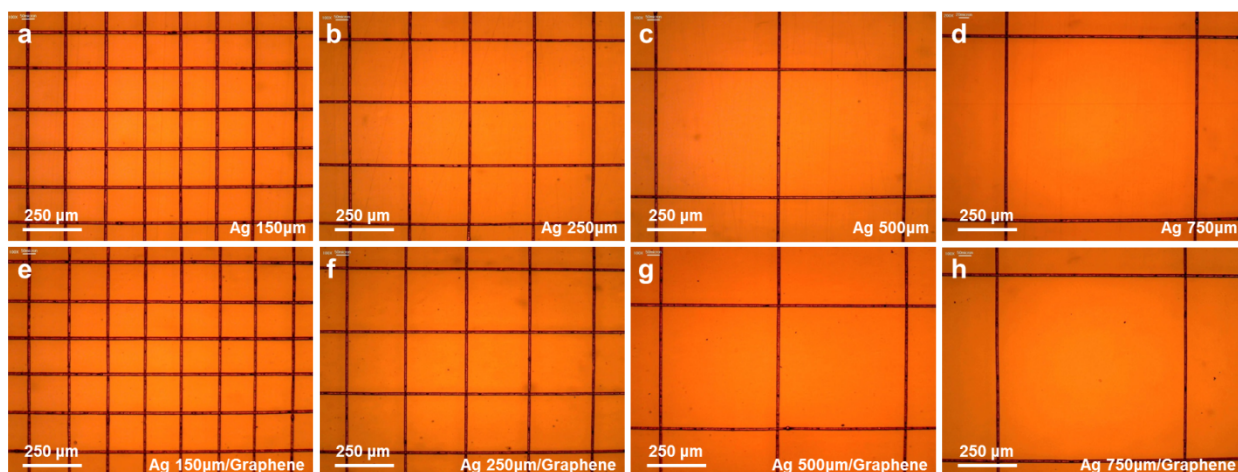

**Fig. S1** The optical microscope images of the square-shaped Ag-grids at different line pitch (150, 250, 500, and 750  $\mu\text{m}$ ) on (a-d) PET and (e-h) graphene/PET substrates. These images are taken under the same magnification.

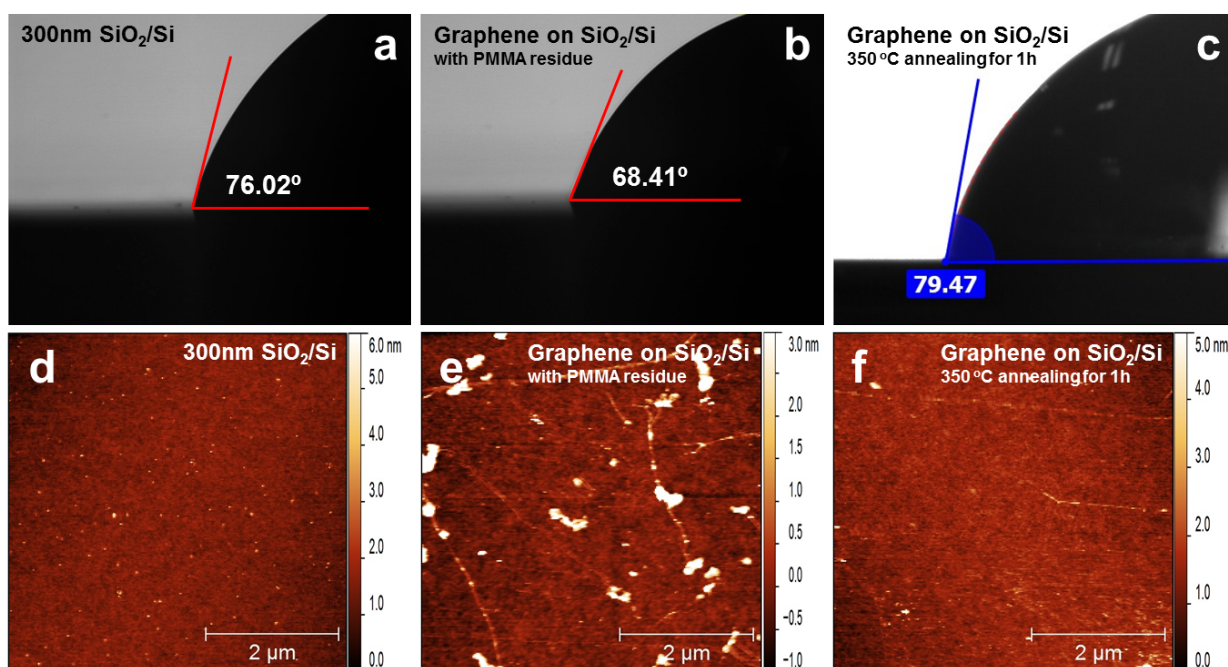

**Fig. S2** (a-c) Contact angles of water droplets on (a) 300 nm  $\text{SiO}_2/\text{Si}$  wafer, (b) graphene after transferred on  $\text{SiO}_2/\text{Si}$ , and (c) graphene/ $\text{SiO}_2/\text{Si}$  after annealing in  $\text{Ar}/\text{H}_2$  at 300  $^\circ\text{C}$ . (d-f) AFM

images of (d) 300 nm SiO<sub>2</sub>/Si wafer, (e) graphene after transferred on SiO<sub>2</sub>/Si, and (f) graphene/SiO<sub>2</sub>/Si after annealing in argon/hydrogen at 300 °C.

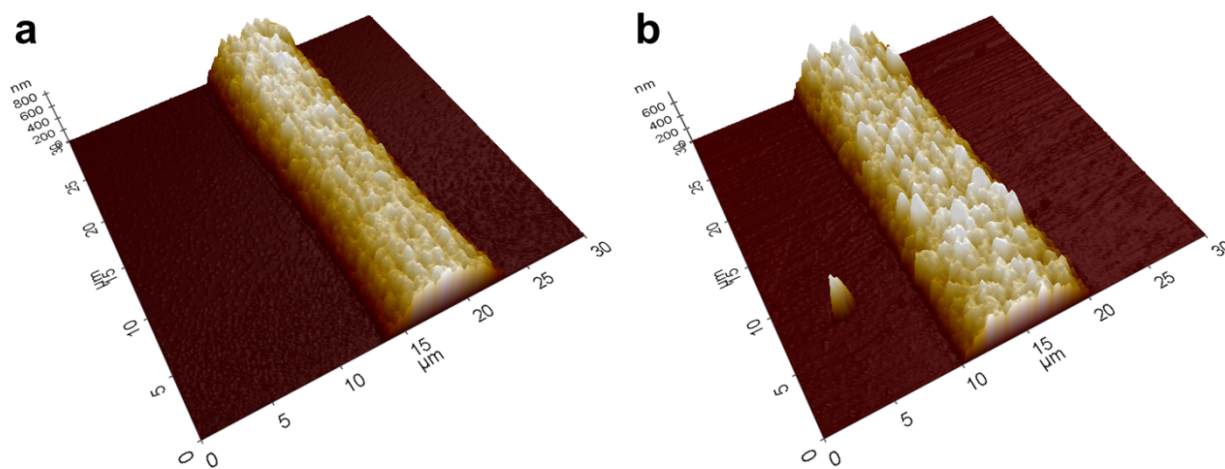

**Fig. S3** 3D profile by AFM images. (a) Ag line and (b) Ag line/graphene on the SiO<sub>2</sub>/Si wafer.

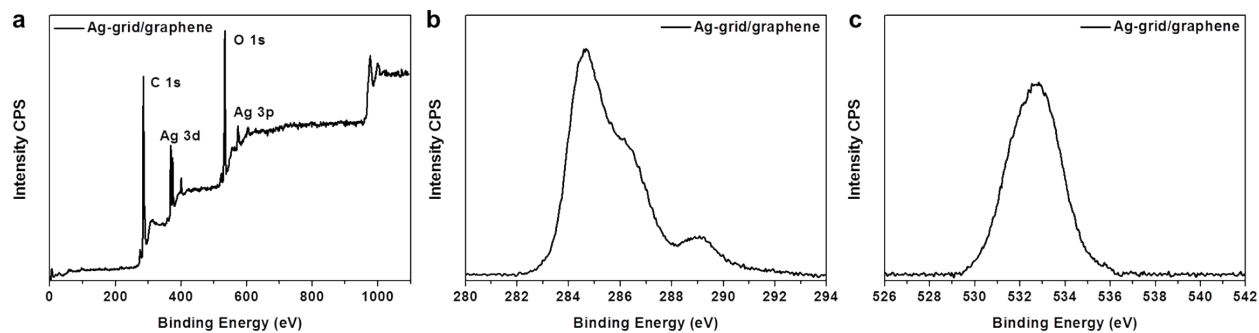

**Fig. S4** XPS spectrum of Ag-grid/graphene on PET substrate. (a) Wide scan of XPS of Ag-grid/graphene on PET substrate. High resolution XPS of (b) C 1s peak and (c) O 1s peak from an Ag-grid/graphene on PET substrate.

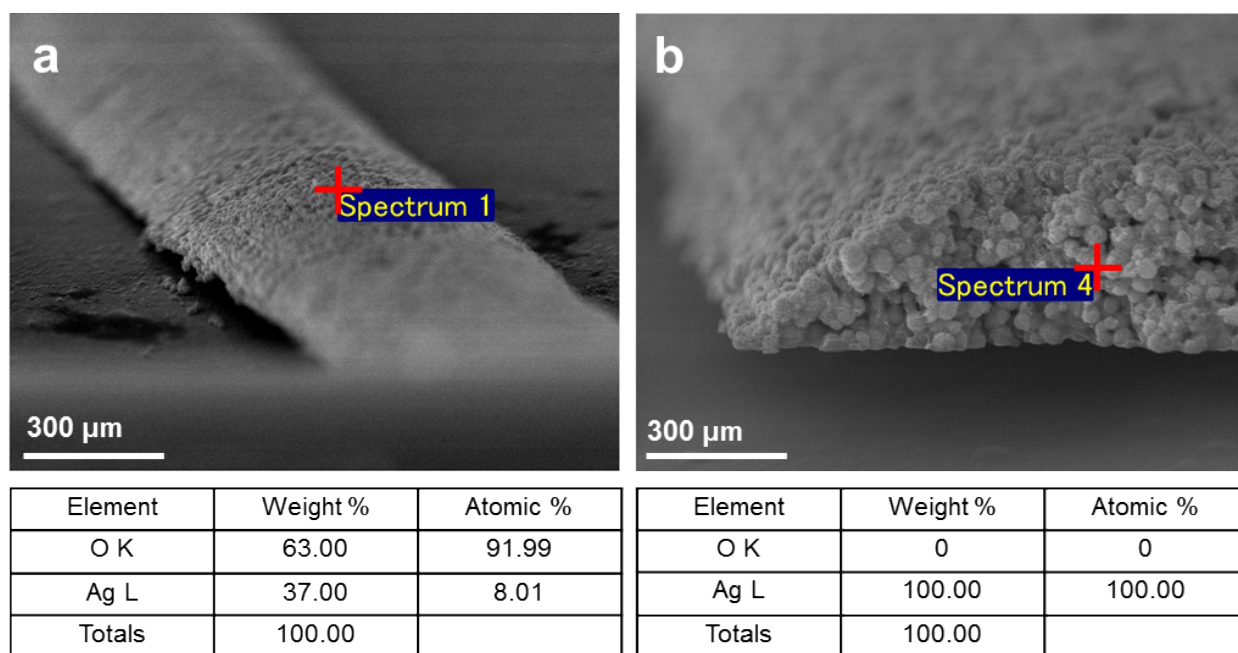

**Fig. S5** SEM images and EDS data for (a) top and (b) middle of Ag-grid/graphene on PET substrate.

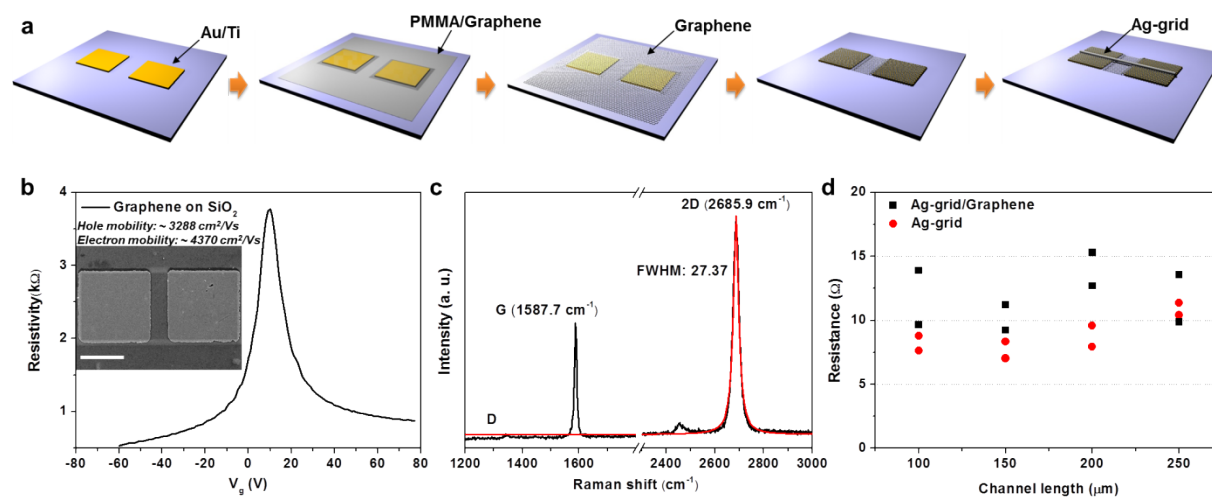

**Fig. S6** Electrical and optical properties of the FET based on graphene and Ag-grid/graphene electrodes. (a) A schematic illustration of fabrication procedures of the Ag-grid/graphene

electrode. (b) Resistivity-gate voltage of a graphene-based device. The left insert shows the SEM image of the graphene-based device. The scale bar in SEM image is 150  $\mu\text{m}$ . The graphene-based device shows ambipolar field effect and 10 V of Dirac voltage. We determined the mobility of graphene-based device from the equation:  $I_D = \frac{W C_i}{L} V_D \mu (V_G - V_T)$ , where  $C_i = 1.08 \times 10^{-8} \text{ Fcm}^{-2}$ ,  $V_D = 0.1 \text{ V}$ ,  $W = 250 \mu\text{m}$ , and  $L = 50 \mu\text{m}$ . (c) Representative Raman spectrum (excitation wavelength: 514nm) of the graphene film. (d) The resistance of the Ag-grid and Ag-grid/graphene as a function of the channel length.

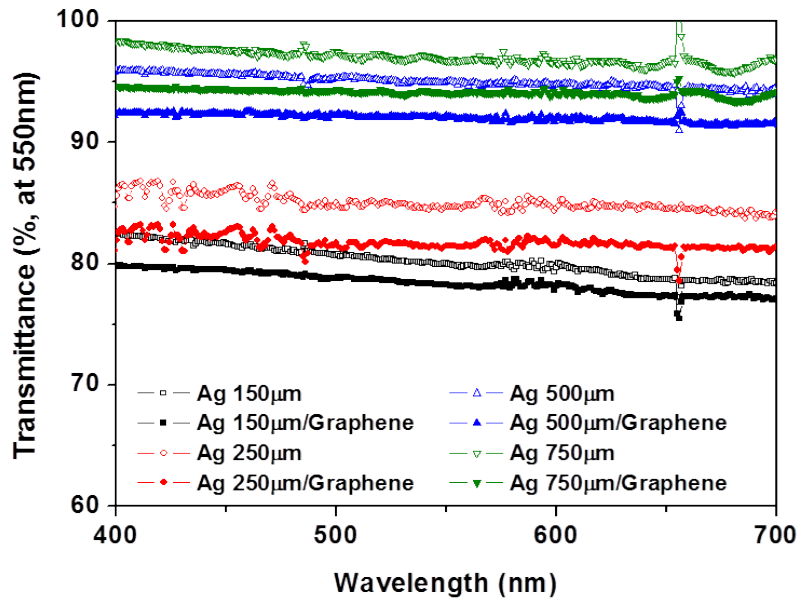

**Fig. S7** Optical properties of Ag-grid and Ag-grid/graphene electrodes on PET substrates.



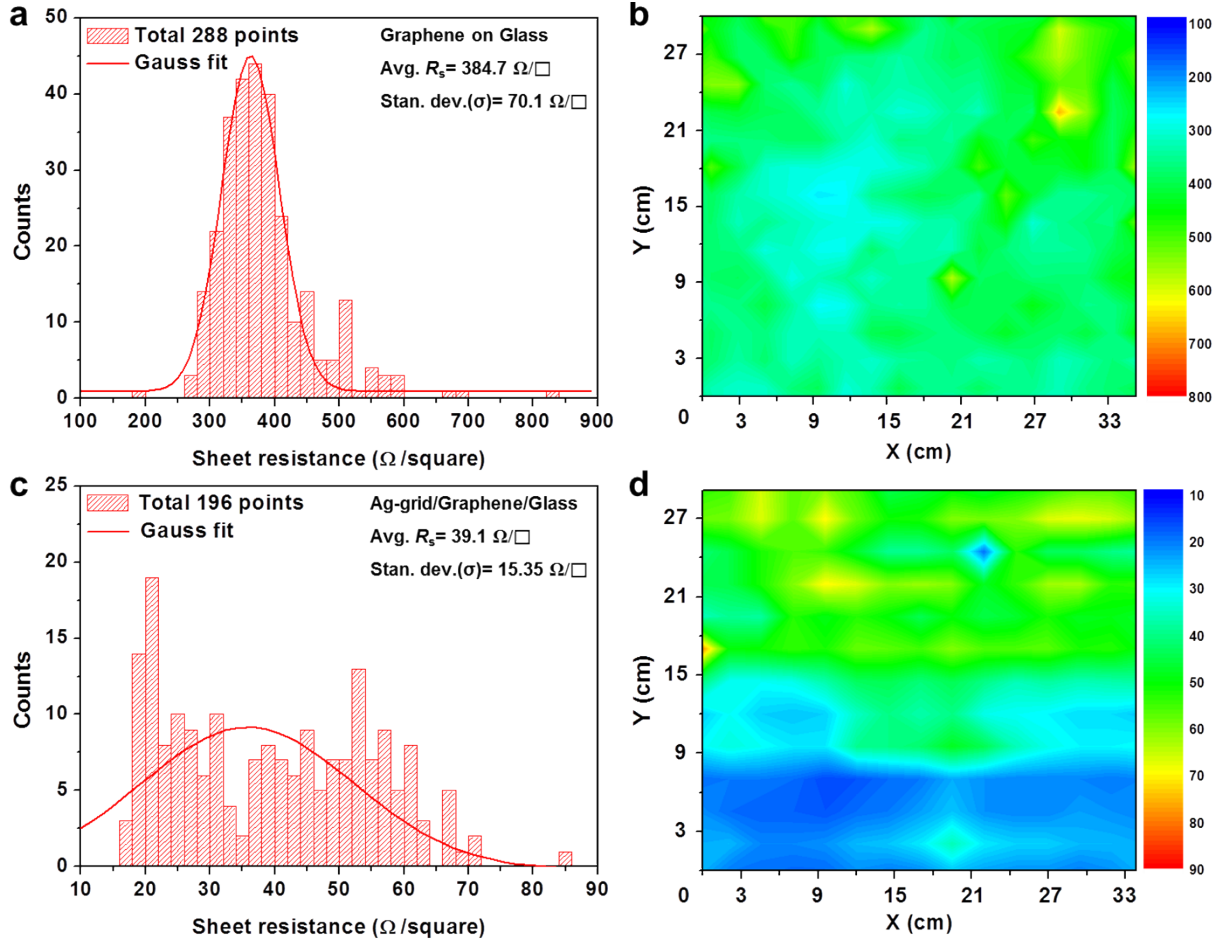

**Fig. S8** Sheet resistance distribution of a large-area (a, b) graphene film and (c, d) a Ag-grid/graphene film on glass substrates. (a, c) The sheet resistance histogram of the  $30 \times 35 \text{ cm}^2$  graphene film and Ag-grid/graphene film. The sheet resistances were measured at 288 points for graphene film and at 196 points for Ag-grid/graphene film. (b, d) The corresponding spatial distribution of sheet resistances.

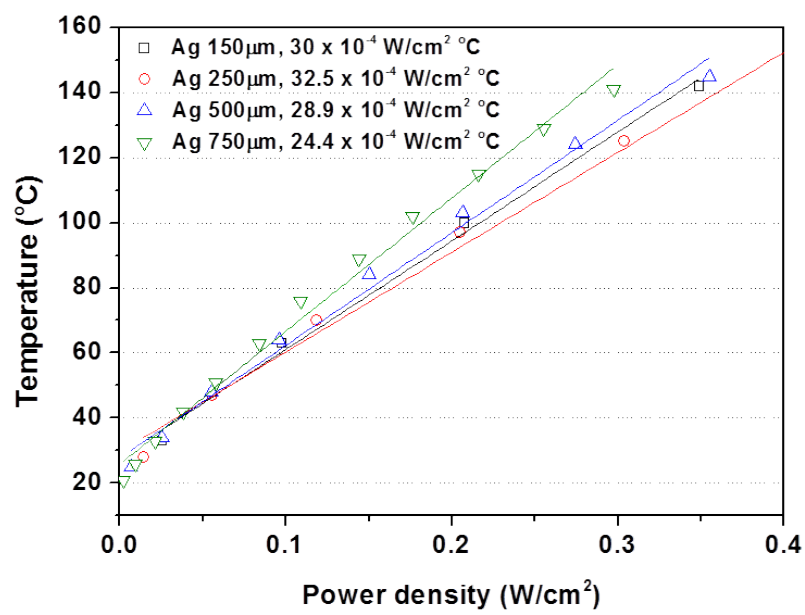

**Fig. S9** Steady-state temperatures of the Ag-grid heaters as a function of input power density.

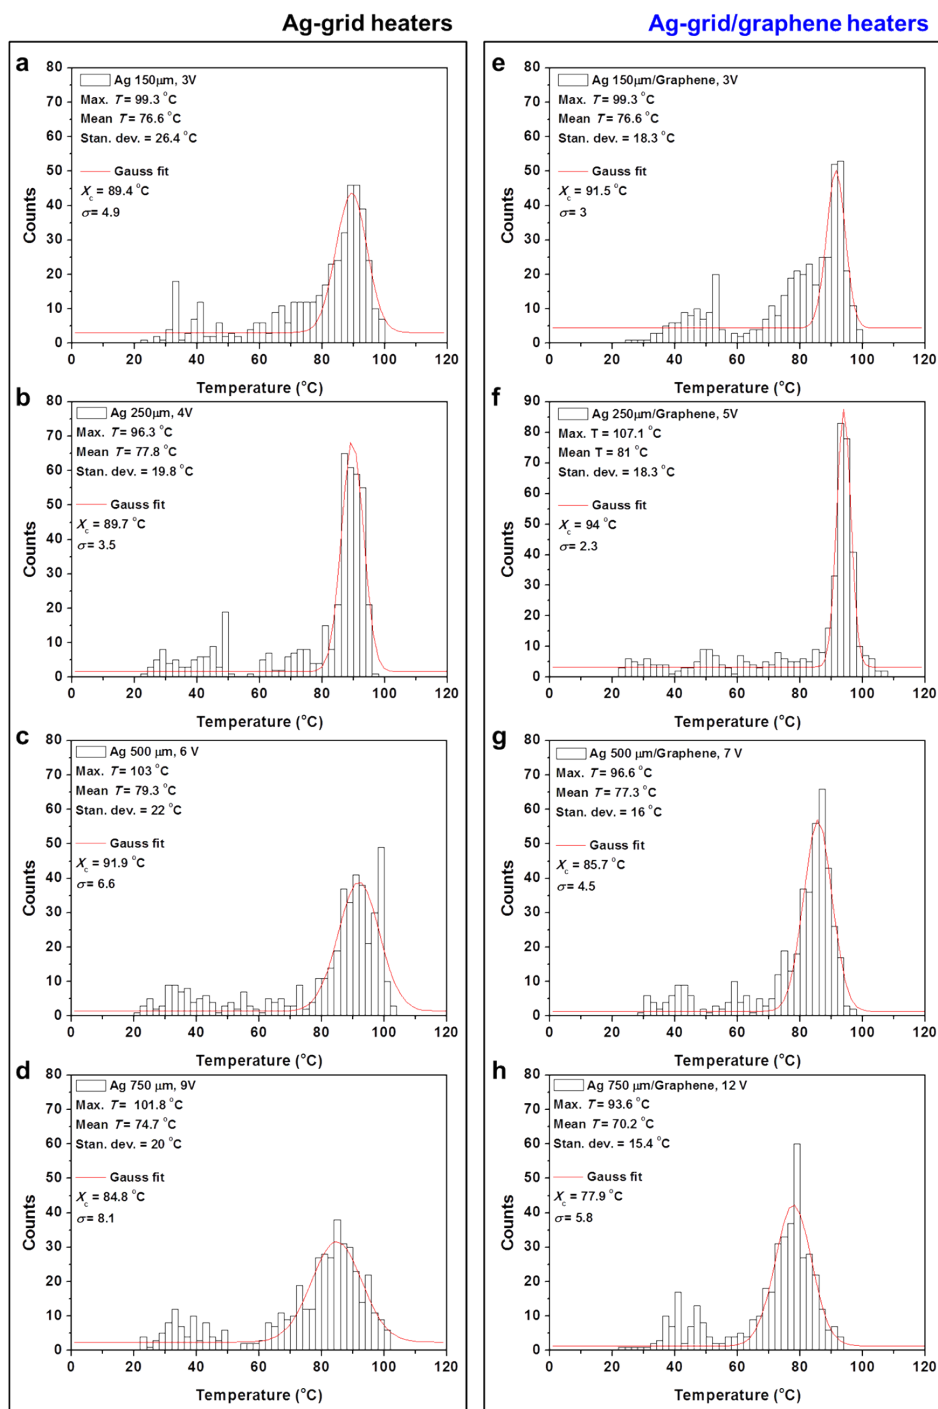

**Fig. S10** Statistical analysis of the temperature distribution in the (a-d) Ag-grid and (e-h) Ag-grid/graphene heaters at approximately  $100^\circ\text{C}$ . All data were measured at the steady-state temperatures.



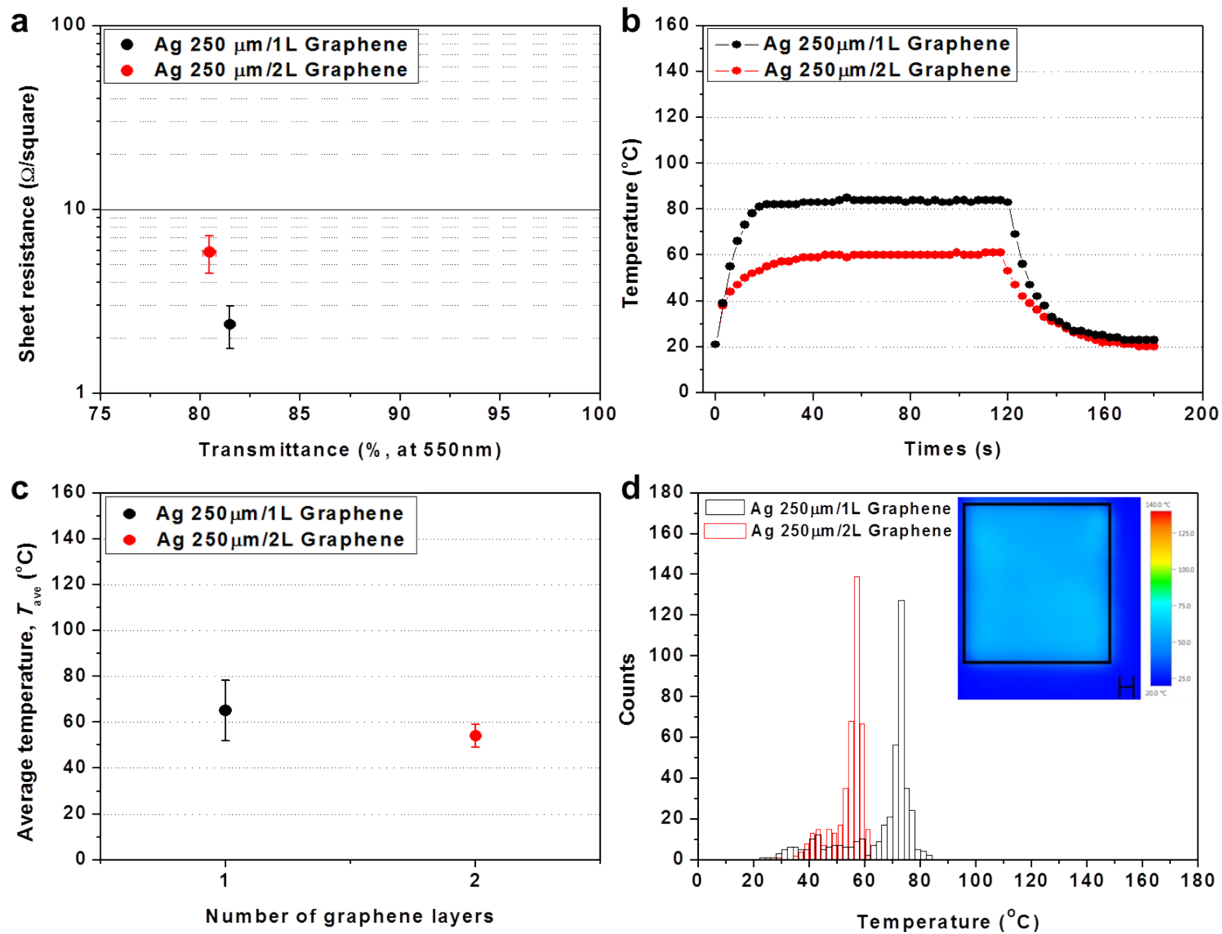

**Fig. S11** Comparison of the Ag-grid/graphene hybrid films depending on the layer numbers of graphene: (a) electrical and optical properties. (b) Time-dependent temperature response. (c) The average temperature and temperature distribution. (d) Statistical analysis of the temperature distribution.
